# Supplementary material
Source: Springer Nature journal article supplement (https://www.springermedizin.de/resource/supplementary/12889_2010_2788_MOESM1_ESM.pdf/9489172)

Cumulative Survival

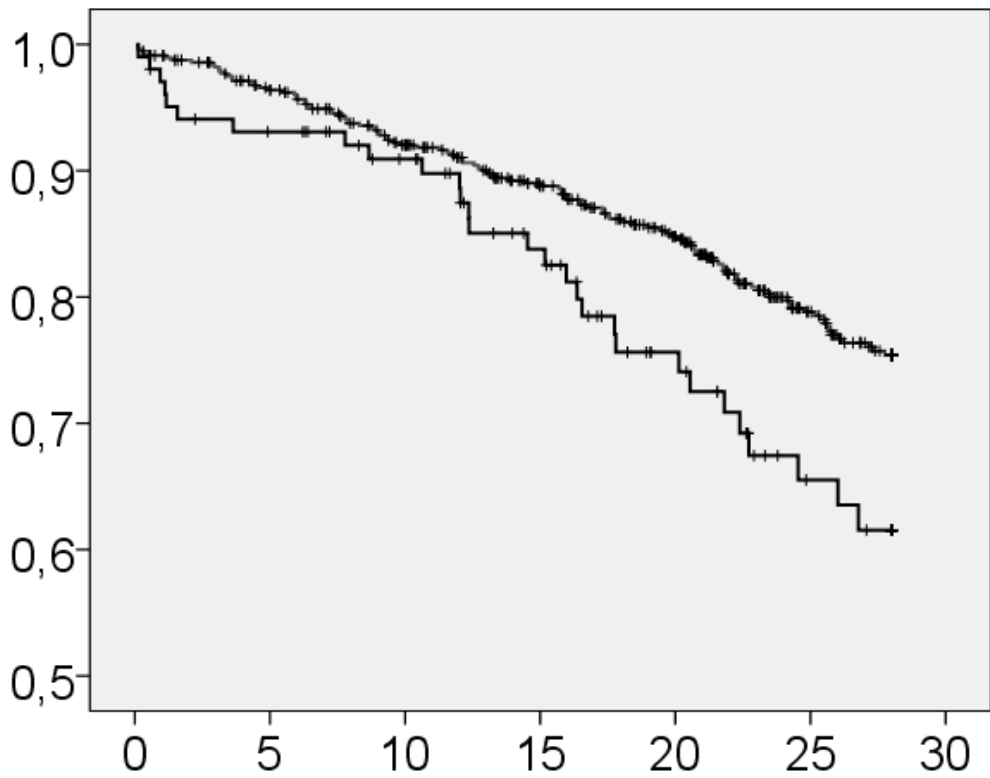

Follow-up (years)

Supplement: MOESM1 [file 9489172]
